# Supplementary material for: Latent IgA Deposition in Donated Kidneys in an Ethnically Diverse Population
Source: PubMed Central journal article supplement — Kidney Int Rep. 2020 Sep 10;5(11):1853–5. doi: 10.1016/j.ekir.2020.08.034 (PMC7609999; doi:10.1016/j.ekir.2020.08.034), 2020-09-10
Supplement: mmc1.pdf [file mmc1.pdf]

## 1 **Supplementary References**

- 2 S1 Waldherr R, Rambausek M, Duncker WD, et al. Frequency of mesangial IgA deposits in a  
3 non-selected autopsy series. *Nephrol Dial Transplant*. 1989;4:943–946.
- 4 S2 Suzuki H, Kiryluk K, Novak J, et al. The pathophysiology of IgA nephropathy. *J Am Soc*  
5 *Nephrol*. 2011;22:1795–1803.
- 6 S3 Gharavi AG, Moldoveanu Z, Wyatt RJ, et al. Aberrant IgA1 glycosylation is inherited in  
7 familial and sporadic IgA nephropathy. *J Am Soc Nephrol*. 2008;19:1008–1014.
- 8 S4 Suzuki H, Fan R, Zhang Z, et al. Aberrantly glycosylated IgA1 in IgA nephropathy patients  
9 is recognized by IgG antibodies with restricted heterogeneity. *J Clin Invest*. 2009;119:1668–  
10 1677.
- 11 S5 Oka K, Nishimura K, Kishikawa H, et al. IgA1 dominant subclass of latent IgA mesangial  
12 deposition in donated kidney. *Int J Nephrol Renovasc Dis*. 2016;9:313–317.
- 13 S6 Rizk D V., Saha MK, Hall S, et al. Glomerular immunodeposits of patients with IgA  
14 nephropathy are enriched for IgG autoantibodies specific for galactose-deficient IgA1. *J Am*  
15 *Soc Nephrol*. 2019;30:2017–2026.
- 16 S7 Sofue T, Inui M, Hara T, et al. Association between post-transplantation immunoglobulin a  
17 deposition and reduced allograft function. *Transplant Proc*. 2015;47:332–336.
- 18 S8 Abrera-Abeleda MA, Xu Y, Pickering MC, et al. Mesangial immune complex  
19 glomerulonephritis due to complement factor D deficiency. *Kidney Int*. 2007;71:1142–1147.

- 1 S9 Stucht S, Gwinner W, Franz I, et al. Lymphatic neoangiogenesis in human renal allografts:  
2 results from sequential protocol biopsies. *Am J Transplant.* 2007;7:377–384.
